# Supplementary material for: Different routes of bismuth mineral transformation during pertechnetate and perrhenate uptake for subsurface remediation
Source: Royal Society of Chemistry journal article supplement (doi:10.1039/d4ew00496e), 2024-01-01
Supplement: d4ew00496e1.pdf [file d4ew00496e1.pdf]

## Electronic Supplementary Information

### Different Routes of Bismuth Mineral Transformation during Pertechetate and Perrhenate Uptake for Subsurface Remediation

Boglaienko D.<sup>\*a</sup>, Bowden M.E.<sup>a</sup>, Escobedo N.M.<sup>a</sup>, Collins Q.M.<sup>a</sup>, Lawter A.R.<sup>a</sup>, Levitskaia T.G.<sup>\*a</sup>, Pearce C.I.<sup>\*a</sup>

<sup>a</sup> Pacific Northwest National Laboratory, 902 Battelle Boulevard, Richland, WA 99354

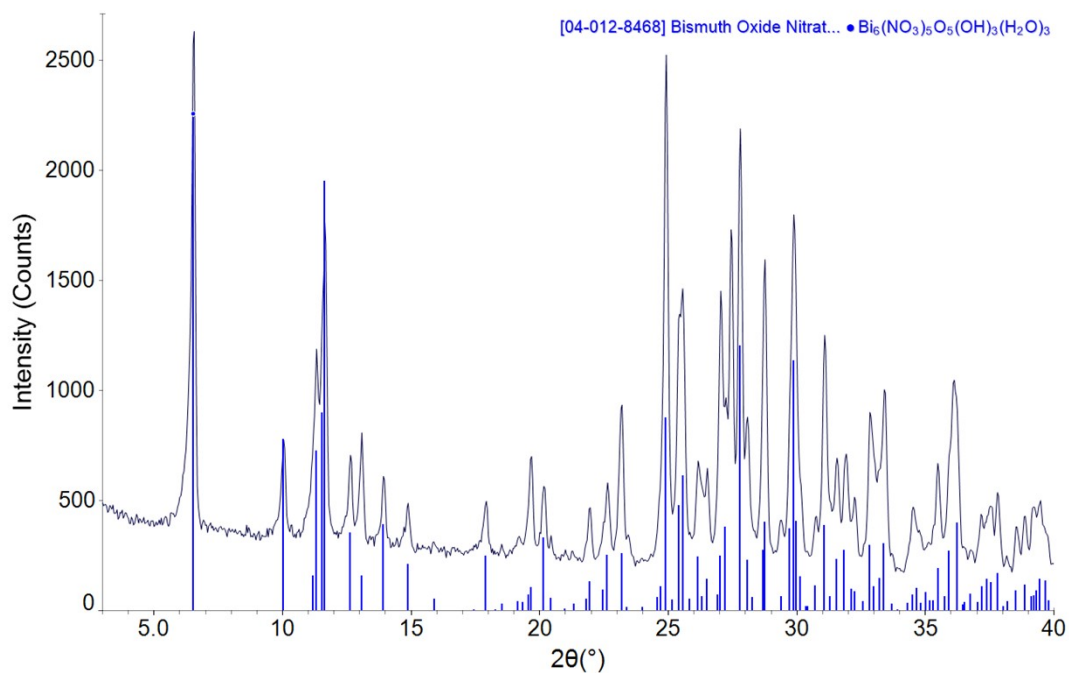

**Figure S1.** PXRD pattern for BSN starting material overlaid with the pattern for bismuth basic nitrate  $[\text{Bi}_6\text{O}_5(\text{OH})_3]^{5+}$  clusters from Lazarini et al. 1978; here denoted as *clus*- $\text{Bi}_{12}\text{O}_{10}(\text{OH})_6(\text{NO}_3)_{10}\cdot 6\text{H}_2\text{O}$ .

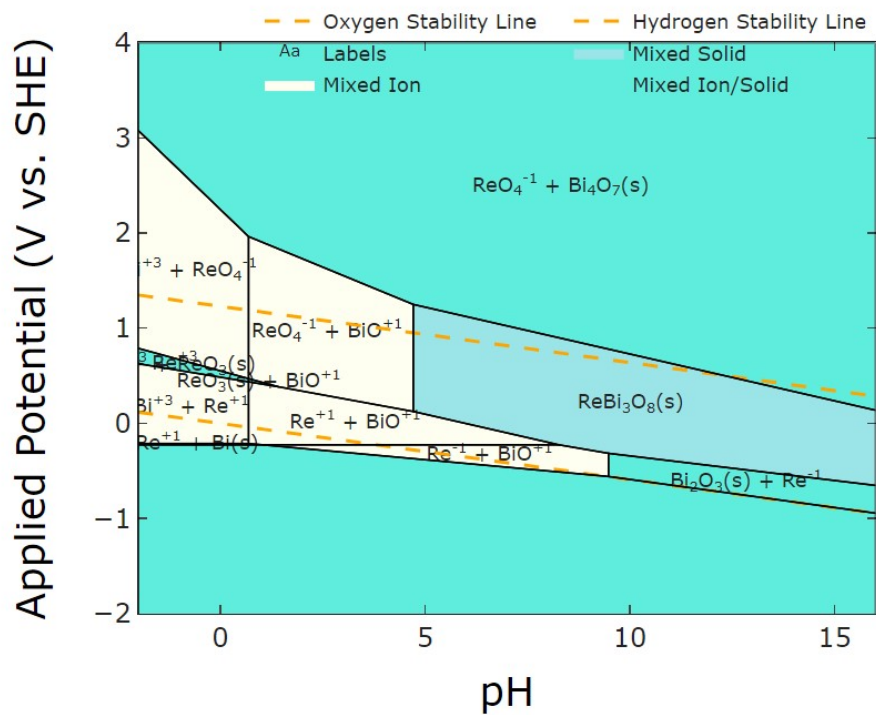

**Figure S2.** Pourbaix diagram, generated using materials project: Patel et al. (2019).

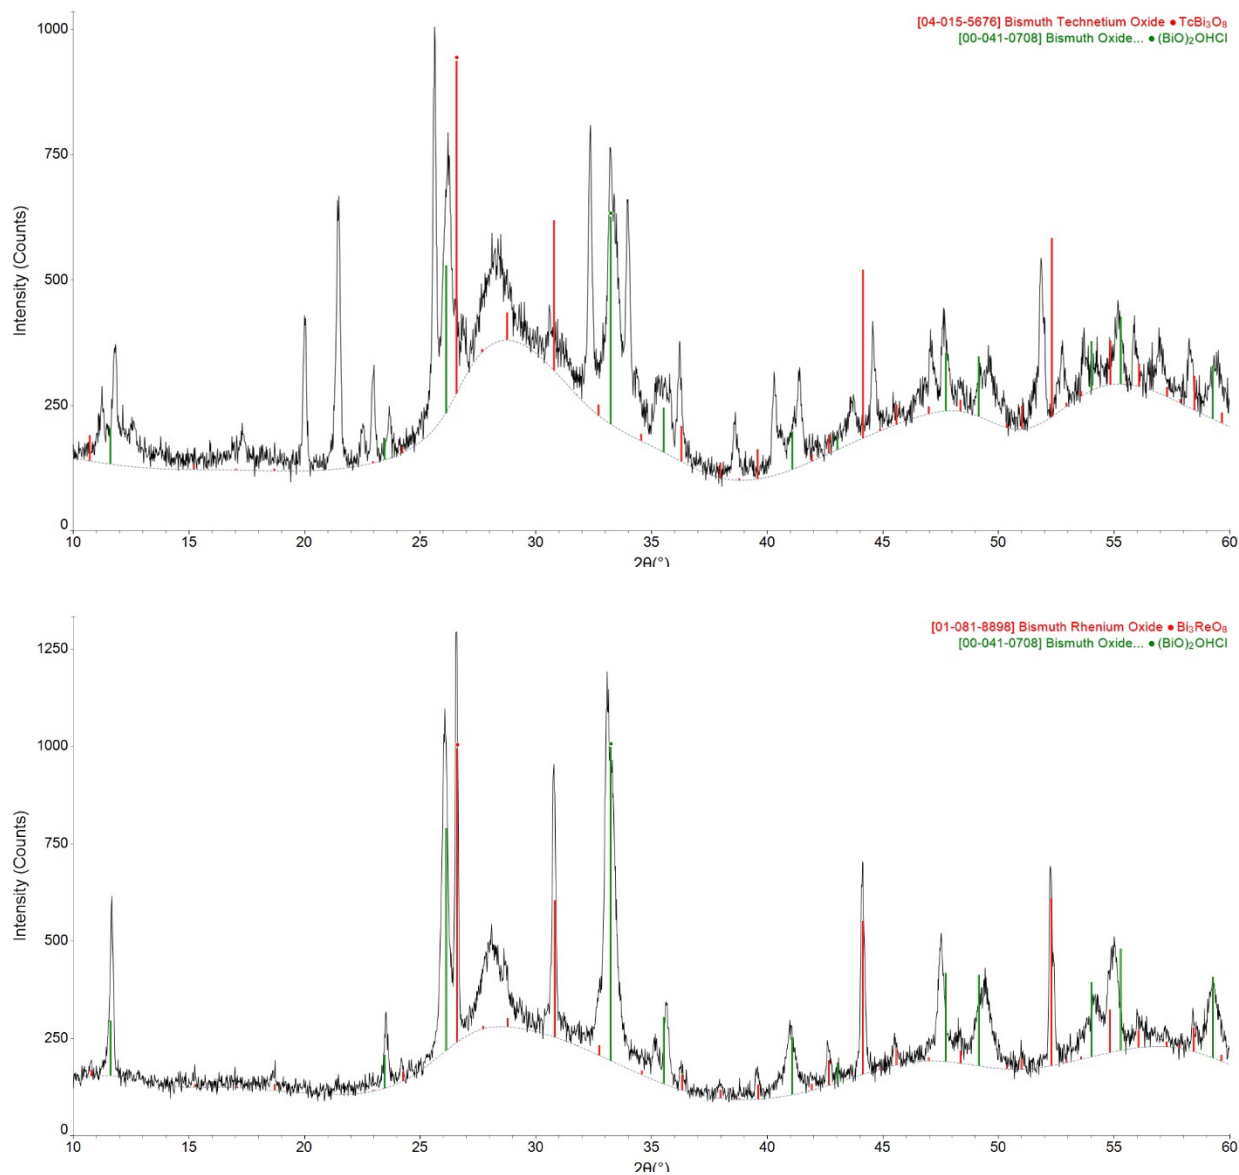

**Figure S3.** PXRD patterns for BSN with 0.17 mM Tc 24 days (top) and 0.17 mM Re 28 days (bottom) matched with daubreite related structure  $(\text{BiO})_2\text{OH,Cl}$  (in green) present in both samples, and demonstration of the absence of  $\text{Bi}_3\text{TcO}_8$  phase in 0.17 mM Tc sample (top) and the presence of  $\text{Bi}_3\text{ReO}_8$  phase in 0.17 mM Re sample (bottom).

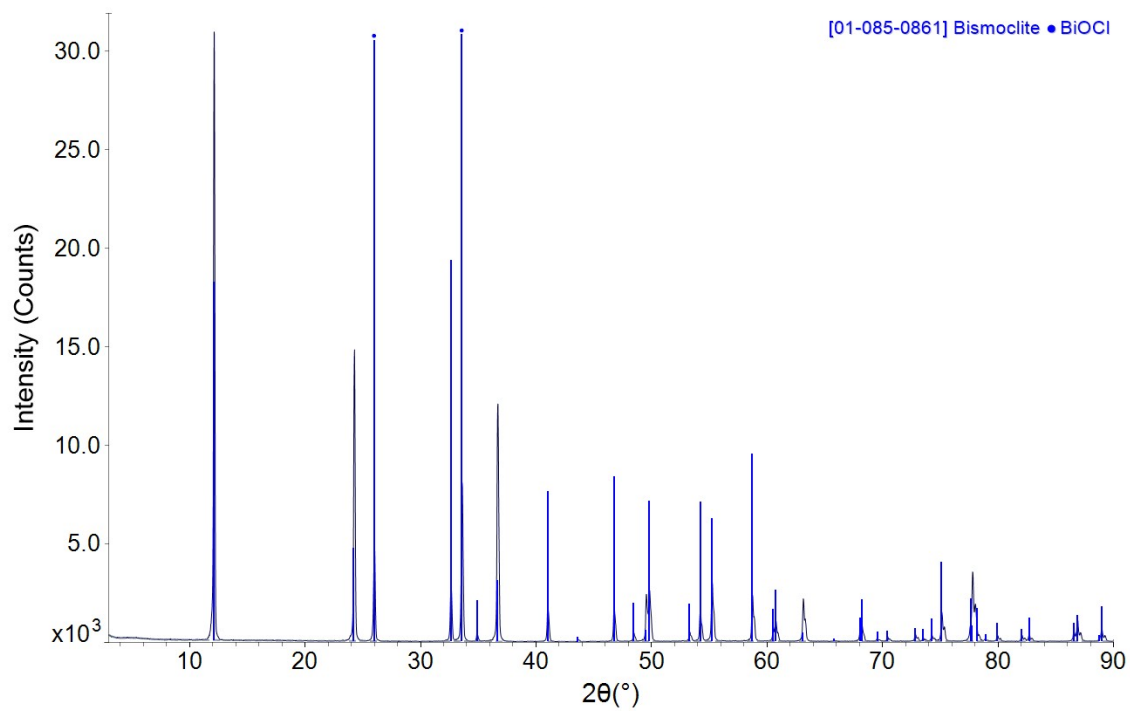

**Figure S4.** PXRD pattern for pristine BiOCl material.

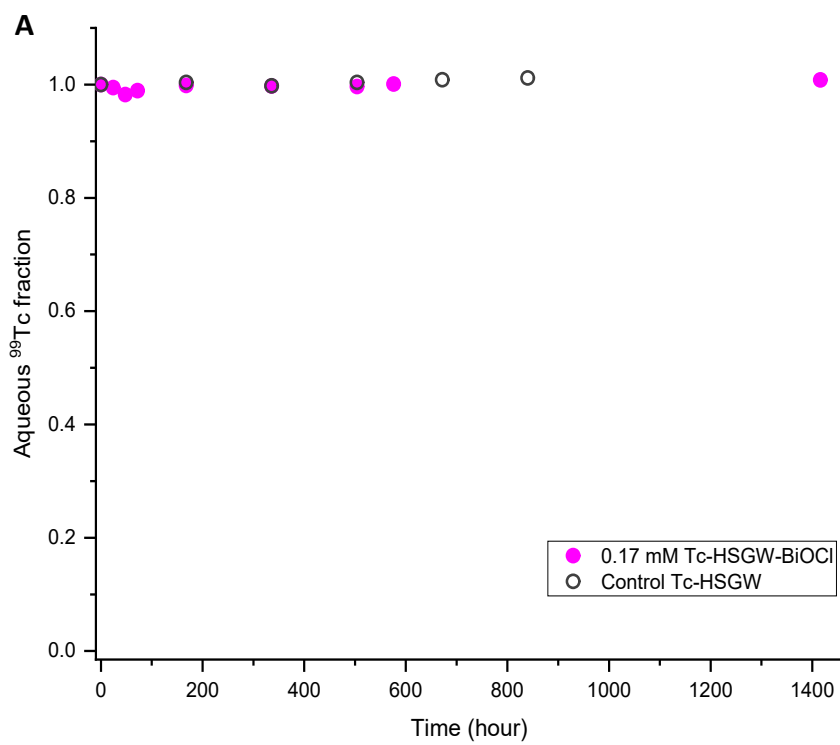

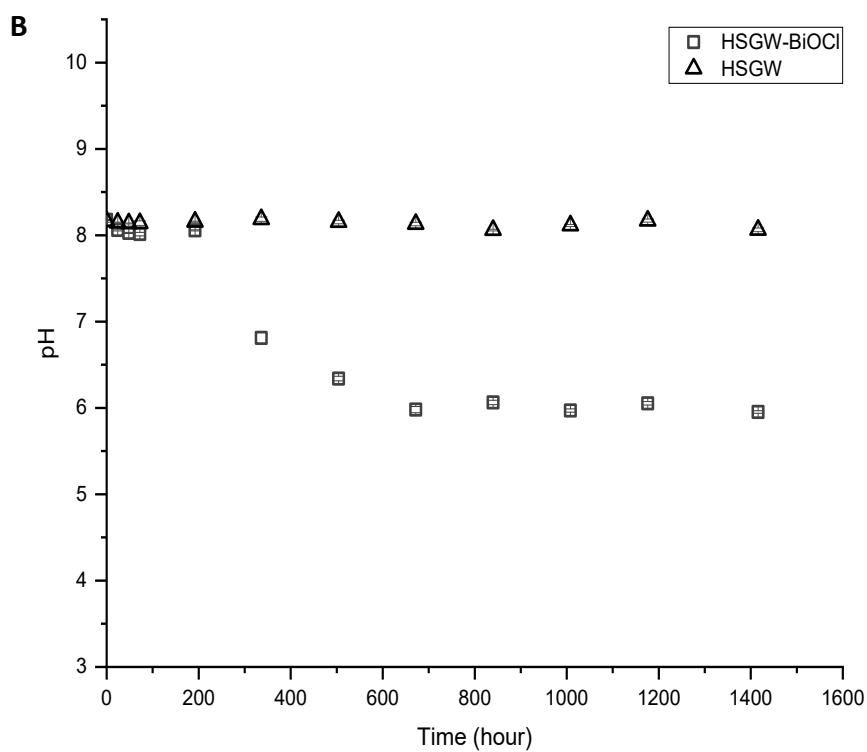

**Figure S5. A.** Removal of 0.17 mM  $\text{TcO}_4^-$  with  $\text{BiOCl}$  starting material (0.1 g) in HSGW simulant (100 mL). Control series: 0.17 mM  $\text{TcO}_4^-$  in HSGW simulant. **B.** PH measurements for control series: HSGW only and HSGW with  $\text{BiOCl}$ .

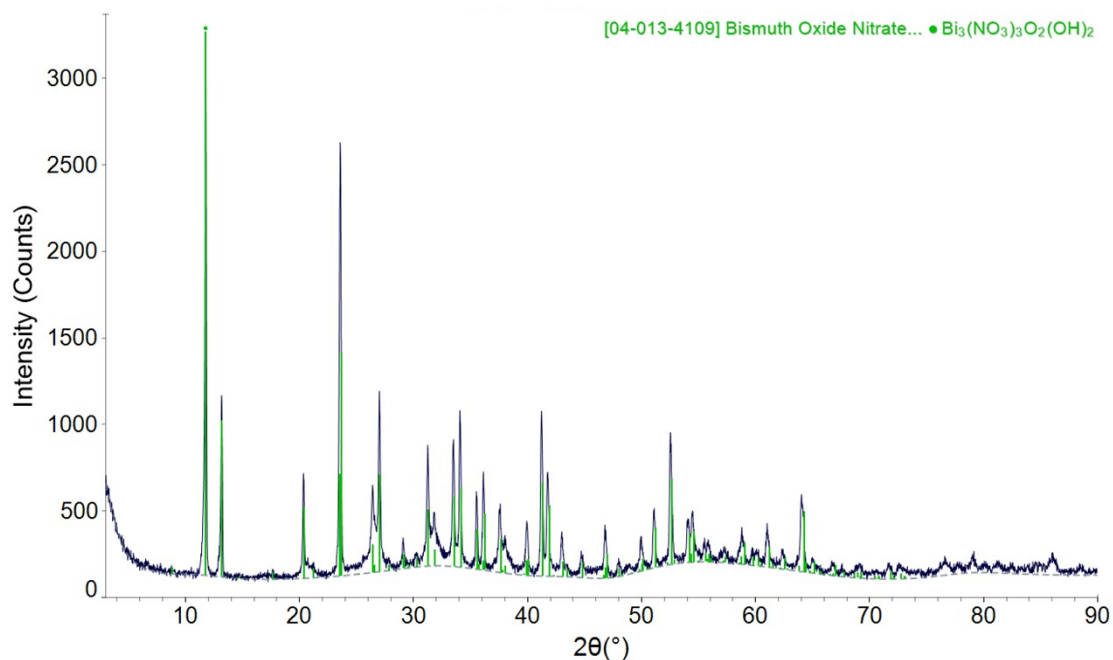

**Figure S6.** PXRD pattern for *clus*-Bi<sub>6</sub>O<sub>4</sub>(OH)<sub>4</sub>(NO<sub>3</sub>)<sub>6</sub> synthesized material (Henry et al., 2006) overlaid with Bi oxide nitrate, Bi<sub>3</sub>(NO<sub>3</sub>)<sub>3</sub>O<sub>2</sub>(OH)<sub>2</sub>.

## References

Lazarini, F., 1978. The crystal structure of a bismuth basic nitrate, [Bi<sub>6</sub>O<sub>5</sub>(OH)<sub>3</sub>](NO<sub>3</sub>)<sub>5</sub>·3 H<sub>2</sub>O. *Acta Crystallographica Section B: Structural Crystallography and Crystal Chemistry*, 34(11), pp.3169-3173.

Patel, A.M., Nørskov, J.K., Persson, K.A. and Montoya, J.H., 2019. Efficient Pourbaix diagrams of many-element compounds. *Physical Chemistry Chemical Physics*, 21(45), pp.25323-25327.

Henry, N., Mentré, O., Abraham, F., MacLean, E.J. and Roussel, P., 2006. Polycationic disorder in [Bi<sub>6</sub>O<sub>4</sub>(OH)<sub>4</sub>](NO<sub>3</sub>)<sub>6</sub>: structure determination using synchrotron radiation and microcrystal X-ray diffraction. *Journal of Solid State Chemistry*, 179(10), pp.3087-3094.
